# Supplementary material for: The cytokine environment influence on human skin–derived T cells
Source: PubMed Central journal article supplement (PMC6463918; doi:10.1096/fj.201801416r), 2019-02-26

# Supplementary Figure 3

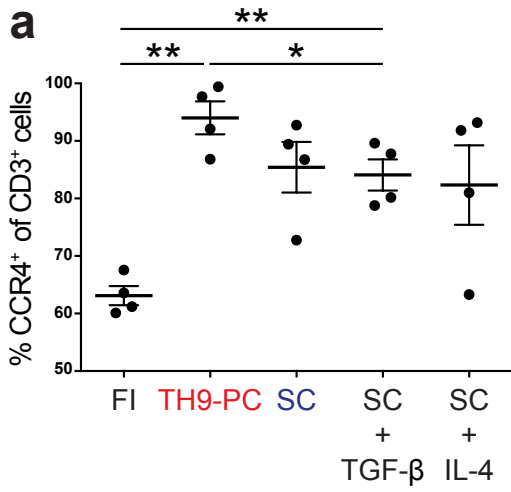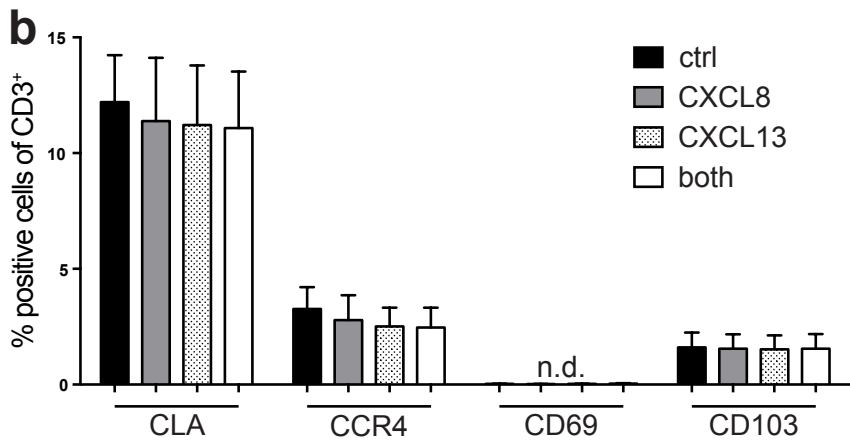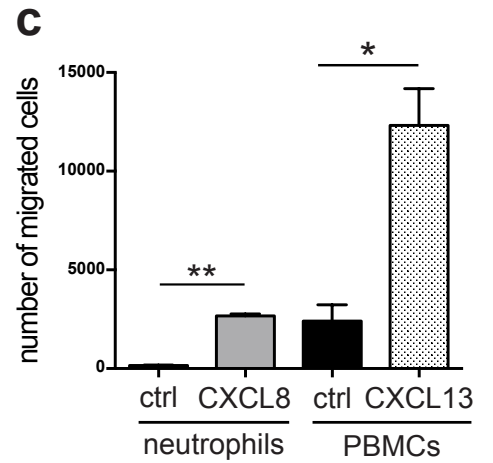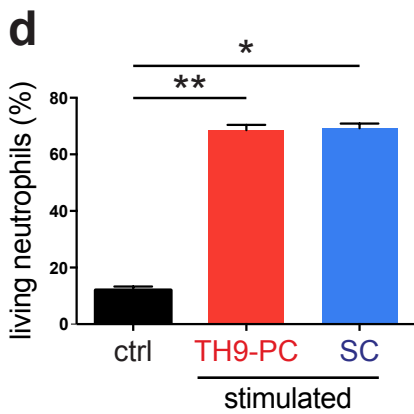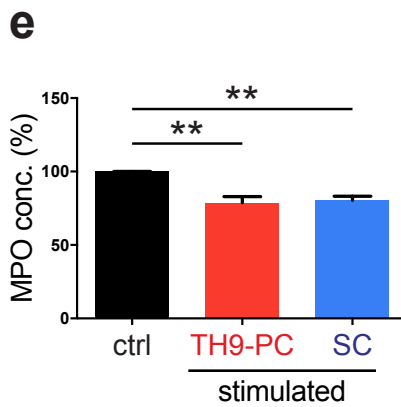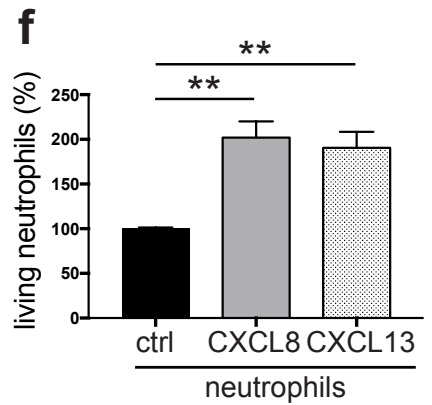

Supplement: fj.201801416R.sf3.pdf [file fj.201801416R.sf3.pdf]
