# Supplementary material for: The cytokine environment influence on human skin–derived T cells
Source: PubMed Central journal article supplement (PMC6463918; doi:10.1096/fj.201801416r), 2019-02-26
Supplement: fj.201801416R.st1.pdf [file fj.201801416R.st1.pdf]

Supplementary Table 1. List of antibodies used

| Antibody      | Conjugate            | Clone             | Company                     | Category                         |
|---------------|----------------------|-------------------|-----------------------------|----------------------------------|
| CD3           | FITC                 | SK7               | BD                          | flow cytometry (surface)         |
| CD3           | PE                   | SK7               | BD                          | flow cytometry (surface)         |
| CD3           | APC                  | SK7               | BD                          | flow cytometry (surface)         |
| CD4           | FITC                 | SK3               | BD                          | flow cytometry (surface)         |
| CD4           | Brilliant Violet 510 | SK3               | BioLegend                   | flow cytometry (surface)         |
| CD8           | APC                  | SK1               | BD                          | flow cytometry (surface)         |
| CD8           | APC-Bio770           | REA734            | Miltenyi                    | flow cytometry (surface)         |
| CD45RA        | FITC                 | T6D11             | Miltenyi                    | flow cytometry (surface)         |
| CD45RO        | PE                   | UCHL1             | BD Pharmingen               | flow cytometry (surface)         |
| CD56          | APC                  | TULY56            | eBioscience (Thermo Fisher) | flow cytometry (surface)         |
| CD69          | PE-Cy7               | FN50              | eBioscience (Thermo Fisher) | flow cytometry (surface)         |
| CD103         | PerCP-eFluor710      | Ber-ACT8          | eBioscience (Thermo Fisher) | flow cytometry (surface)         |
| CCR4          | APC                  | D8SEE             | eBioscience (Thermo Fisher) | flow cytometry (surface)         |
| CCR4          | APC                  | 205410            | R&D Systems                 | flow cytometry (surface)         |
| CLA           | FITC                 | HECA-452          | BioLegend                   | flow cytometry (surface)         |
| IL-9          | PE                   | MH9A3             | BD                          | flow cytometry (intracellular)   |
| IL-13         | FITC                 | 85BRD             | eBioscience (Thermo Fisher) | flow cytometry (intracellular)   |
| IL-17A        | PerCP-Cy7            | BL168             | BioLegend                   | flow cytometry (intracellular)   |
| IFN- $\gamma$ | PE-Cy7               | 4S.B3             | eBioscience (Thermo Fisher) | flow cytometry (intracellular)   |
| Ki-67         | FITC                 | 20Raj1            | eBioscience (Thermo Fisher) | flow cytometry (intranuclear)    |
| FoxP3         | Alexa647             | 259D/C7           | BD Pharmingen               | flow cytometry (intranuclear)    |
| IRF4          | unconjugated         | polyclonal rabbit | CS&T                        | immunofluorescence, Western blot |
| PU.1          | unconjugated         | 9G7               | CS&T                        | immunofluorescence, Western blot |
| GAPDH         | unconjugated         | 6C5               | abcam                       | Western blot                     |
| CD3 abcam     | unconjugated         | SP7               | Abcam                       | immunofluorescence               |
| IL-9          | unconjugated         | MH9D1             | BioLegend                   | immunofluorescence               |
